# Supplementary material
Source: Springer Nature journal article supplement (https://www.springermedizin.de/resource/supplementary/12943_2008_409_MOESM12_ESM.pdf/9554200)
Supplement: MOESM12 [file 9554200]

HeLa GFPsi

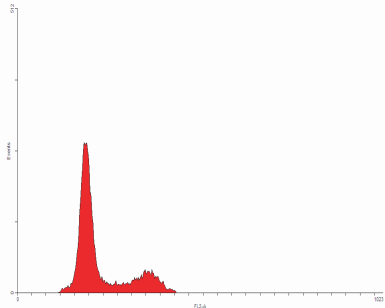

G1-70.9+/-1.6%  
S-10.9+/-0.7%  
G2/M-16.7+/-0.9%  
G2-14.2+/-0.2%  
M- 2.5+/-0.7%

HeLa-GFPsi Go6976

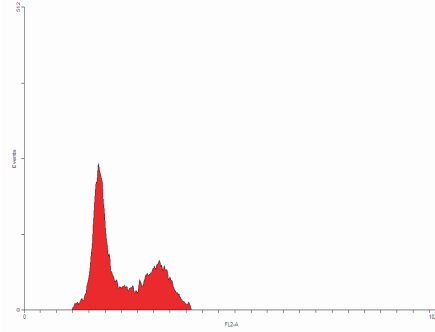

G1-52.0+/-2.5%  
S-17.1+/-2.4%  
G2/M 27.3+/-1.0%  
G2-19.1+/-2.1%  
M- 8.1+/-1.1%

HeLa-FAAsi

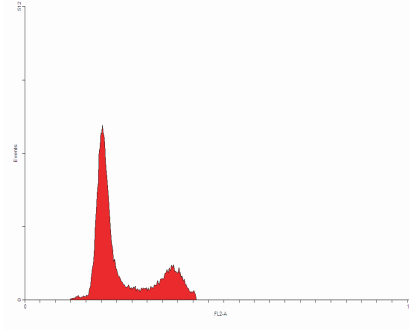

G1-66.2+/-1.9%  
S-10.6+/-0.3%  
G2/M-22.0+/-0.3%  
G2-19.1+/-0.6%  
M-2.9+/-0.3%

HeLa-FAAsi Go6976

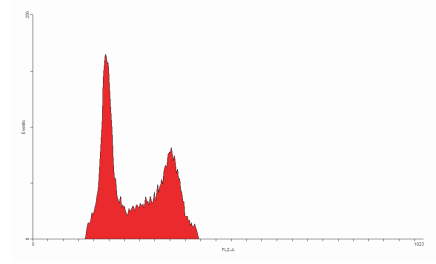

G1-49.5+/-4.2%  
S-15.9+/-3.8%  
G2/M- 30.6+/-4.7.3%  
G2-22.0+/-1.9%  
M- 8.8+/-2.9%

HeLa-BR2si

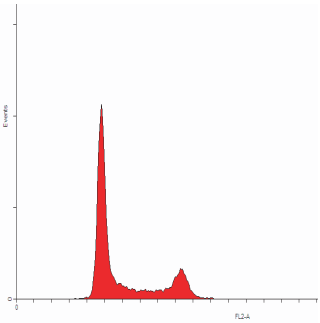

G1-64.6+/-1.9%  
S-14.1+/-2.2%  
G2/M-20.7+/-0.8%  
G2-17.8+/-0.9%  
M- 2.9+/-0.1%

HeLa-BR2si Go6976

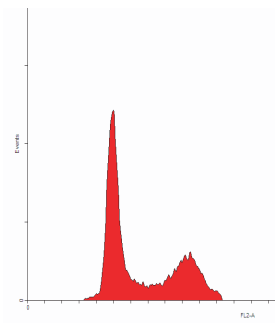

G1-56.0+/-1.0%  
S-15.6+/-0.9%  
G2/M-27.6+/-3.0%  
G2-21.1%+/-2.5%  
M-6.5%+/-0.5%
